# Supplementary material
Source: MDPI journal article supplement (https://www.mdpi.com/2073-445X/13/2/243)
Supplement: s1 [file s1]

**Table S1:** Transition matrix of land use in the study area from 1954 to 2016. Characters in Bold represent the actual used hectares. The characters in Normal represent the rate of changes through time.

| 2016 \ 1954                                | 1954                           |              |                 |                         |                          |                |               |                      |                                |             |                                            |             | 1954    |
|--------------------------------------------|--------------------------------|--------------|-----------------|-------------------------|--------------------------|----------------|---------------|----------------------|--------------------------------|-------------|--------------------------------------------|-------------|---------|
|                                            | Urbanized, buildings and roads | Agricultural | Chestnut groves | Dense deciduous forests | Sparse deciduous forests | Wooded pasture | Grasslands    | Sinkholes grasslands | Mosaic of open and shrub areas | Shrublands  | Grasslands with scattered shrubs and trees | Waters      |         |
| Urbanized, buildings and roads             | <b>29.15</b>                   | 0.41         | 0.70            | 0.78                    | 2.86                     | 0.00           | 0.01          | 0.24                 | 0.32                           | 0.07        | 0.32                                       | 0.00        | 34.87   |
| Agricultural                               | 36.54                          | <b>95.80</b> | 7.67            | 0.31                    | 14.77                    | 0.37           | 1.97          | 3.82                 | 4.11                           | 7.42        | 0.61                                       | 0.00        | 173.39  |
| Chestnut groves                            | 37.85                          | 14.06        | <b>257.57</b>   | 14.22                   | 34.82                    | 0.70           | 1.71          | 2.90                 | 2.76                           | 3.13        | 1.87                                       | 0.00        | 371.59  |
| Dense deciduous forests                    | 3.16                           | 0.06         | 0.45            | <b>313.29</b>           | 176.20                   | 0.04           | 0.00          | 1.50                 | 0.54                           | 0.24        | 0.85                                       | 0.00        | 496.33  |
| Sparse deciduous forests                   | 7.95                           | 5.85         | 9.54            | 339.08                  | <b>643.11</b>            | 2.16           | 1.21          | 7.77                 | 8.59                           | 8.45        | 5.43                                       | 0.01        | 1039.14 |
| Wooded pasture                             | 0.00                           | 0.00         | 0.00            | 0.00                    | 0.00                     | <b>0.00</b>    | 0.00          | 0.00                 | 0.00                           | 0.00        | 0.00                                       | 0.00        | 0.00    |
| Sinkholes grasslands                       | 4.08                           | 7.10         | 0.25            | 0.72                    | 22.58                    | 0.00           | <b>107.01</b> | 7.78                 | 2.86                           | 6.64        | 5.08                                       | 0.51        | 164.60  |
| Grasslands                                 | 6.71                           | 11.39        | 2.12            | 4.00                    | 64.45                    | 0.60           | 2.67          | <b>199.66</b>        | 57.32                          | 7.38        | 10.39                                      | 0.00        | 366.69  |
| Mosaic of open and shrub areas             | 4.13                           | 6.30         | 3.46            | 16.42                   | 241.66                   | 0.48           | 3.07          | 53.17                | <b>85.42</b>                   | 10.15       | 38.52                                      | 0.00        | 462.78  |
| Shrublands                                 | 1.05                           | 2.92         | 1.00            | 26.15                   | 86.18                    | 0.03           | 0.83          | 1.63                 | 1.47                           | <b>5.36</b> | 0.99                                       | 0.00        | 127.59  |
| Grasslands with scattered shrubs and trees | 3.49                           | 2.60         | 3.63            | 29.19                   | 235.57                   | 0.20           | 1.99          | 10.85                | 19.03                          | 11.41       | <b>10.76</b>                               | 0.00        | 328.72  |
| Waters                                     | 0.00                           | 0.00         | 0.00            | 0.00                    | 0.00                     | 0.00           | 0.00          | 0.00                 | 0.00                           | 0.00        | 0.00                                       | <b>0.62</b> | 0.62    |
| <b>2016</b>                                | 134.11                         | 146.50       | 286.38          | 744.17                  | 1522.20                  | 4.57           | 120.47        | 289.31               | 182.41                         | 60.25       | 74.81                                      | 1.15        | 3566.32 |
